# Supplementary material
Source: HighWire-hosted journal article supplement (https://cmaj.ca/highwire/filestream/150661/field_highwire_adjunct_files/7/231419-res-8-at.pdf)
Supplement: 231419-res-8-at.pdf [file 231419-res-8-at.pdf]

## Appendix VIII: Secondary analysis of patients who died from non-sudden death causes between July 1, 2015 and December 31, 2018

**Table 1.** Baseline characteristics of decedent cohort, comparing those who died of non-sudden death causes with a history of opioid use disorder (OUD) to those without OUD.

| Characteristic                | No. (%) of decedents |                              |         |                                                         |         |                         |         |                                            |         |                                                                          |         |                                          |         |                                                                                 |  |                            |
|-------------------------------|----------------------|------------------------------|---------|---------------------------------------------------------|---------|-------------------------|---------|--------------------------------------------|---------|--------------------------------------------------------------------------|---------|------------------------------------------|---------|---------------------------------------------------------------------------------|--|----------------------------|
|                               | Total<br>n= 323,727  | No OUD<br>n= 320,995 (99.1%) |         | No OUD (age-matched <sup>A</sup> )<br>n= 10,913 (3.37%) |         | OUD<br>n= 2,732 (0.84%) |         | Total OUD <sup>C</sup><br>n= 2,732 (0.84%) |         | Hospitalizations or<br>emergency<br>department visits<br>n=1,214 (0.38%) |         | OAT <sup>D</sup> only<br>n=1,099 (0.34%) |         | Hospitalizations or<br>emergency department<br>visits and OAT<br>n= 419 (0.13%) |  | Std.<br>Diff. <sup>B</sup> |
| Sex                           |                      |                              |         |                                                         |         |                         |         |                                            |         |                                                                          |         |                                          |         |                                                                                 |  |                            |
| Female                        | 162,528              | 161,376                      | (50.3%) | 4,695                                                   | (43.0%) | 1,152                   | (42.2%) | 606                                        | (49.9%) | 368                                                                      | (33.5%) | 178                                      | (42.5%) | 0.02                                                                            |  |                            |
| Male                          | 161,199              | 159,619                      | (49.7%) | 6,218                                                   | (57.0%) | 1,580                   | (57.8%) | 608                                        | (50.1%) | 731                                                                      | (66.5%) | 241                                      | (57.5%) | 0.02                                                                            |  |                            |
| Age, yr                       |                      |                              |         |                                                         |         |                         |         |                                            |         |                                                                          |         |                                          |         |                                                                                 |  |                            |
| 18-44                         | 6,337                | 5,804                        | (1.8%)  | 2,099                                                   | (19.2%) | 533                     | (19.5%) | 122                                        | (10.0%) | *246-250                                                                 |         | *161-165                                 |         | 0.01                                                                            |  |                            |
| 45-54                         | 13,080               | 12,518                       | (3.9%)  | 2,180                                                   | (20.0%) | 562                     | (20.6%) | 161                                        | (13.3%) | 305                                                                      | (27.8%) | 96                                       | (22.9%) | 0.02                                                                            |  |                            |
| 55-64                         | 34,820               | 34,051                       | (10.6%) | 3,100                                                   | (28.4%) | 769                     | (28.1%) | 291                                        | (24.0%) | 369                                                                      | (33.6%) | 109                                      | (26.0%) | 0.01                                                                            |  |                            |
| 65-74                         | 58,867               | 58,466                       | (18.2%) | 1,665                                                   | (15.3%) | 401                     | (14.7%) | 234                                        | (19.3%) | 125                                                                      | (11.4%) | 42                                       | (10.0%) | 0.02                                                                            |  |                            |
| 75-84                         | 86,097               | 85,811                       | (26.7%) | 1,125                                                   | (10.3%) | 286                     | (10.5%) | 236                                        | (19.4%) | 44                                                                       | (4.0%)  | 6                                        | (1.4%)  | 0.01                                                                            |  |                            |
| 85+                           | 124,526              | 124,345                      | (38.7%) | 744                                                     | (6.8%)  | 181                     | (6.6%)  | 170                                        | (14.0%) | *6-10                                                                    |         | *1-5                                     |         | 0.01                                                                            |  |                            |
| Age, mean (SD)                | 78.01                | 78.18                        | (13.53) | 58.36                                                   | (16.43) | 58.07                   | (16.47) | 65.83                                      | (16.50) | 53.41                                                                    | (13.02) | 47.82                                    | (14.14) | 0.01                                                                            |  |                            |
| Income Quintile               |                      |                              |         |                                                         |         |                         |         |                                            |         |                                                                          |         |                                          |         |                                                                                 |  |                            |
| Quintile 1 (Q1)               | 73,445               | 72,434                       | (22.6%) | 2,617                                                   | (24.0%) | 1,011                   | (37.0%) | 372                                        | (30.6%) | 476                                                                      | (43.3%) | 163                                      | (38.9%) | 0.29                                                                            |  |                            |
| Q2                            | 62,309               | 61,800                       | (19.2%) | 2,023                                                   | (18.5%) | 509                     | (18.6%) | 226                                        | (18.6%) | 197                                                                      | (17.9%) | 86                                       | (20.5%) | 0                                                                               |  |                            |
| Q3                            | 52,627               | 52,269                       | (16.3%) | 1,795                                                   | (16.4%) | 358                     | (13.1%) | 158                                        | (13.0%) | 137                                                                      | (12.5%) | 63                                       | (15.0%) | 0.09                                                                            |  |                            |
| Q4                            | 46,375               | 46,126                       | (14.4%) | 1,512                                                   | (13.9%) | 249                     | (9.1%)  | 123                                        | (10.1%) | 99                                                                       | (9.0%)  | 27                                       | (6.4%)  | 0.15                                                                            |  |                            |
| Q5 (Highest)                  | 43,612               | 43,395                       | (13.5%) | 1,422                                                   | (13.0%) | 217                     | (7.9%)  | 119                                        | (9.8%)  | *72-76                                                                   | (7.7%)  | *22-26                                   |         | 0.17                                                                            |  |                            |
| Rurality                      |                      |                              |         |                                                         |         |                         |         |                                            |         |                                                                          |         |                                          |         |                                                                                 |  |                            |
| Rural                         | 43,975               | 43,605                       | (13.6%) | 1,502                                                   | (13.8%) | 370                     | (13.5%) | 210                                        | (17.3%) | 113                                                                      | (10.3%) | 47                                       | (11.2%) | 0.01                                                                            |  |                            |
| Urban <sup>E</sup>            | 278,368              | 276,024                      | (86%)   | 9,369                                                   | (85.8%) | 2,344                   | (85.8%) | 998                                        | (82.2%) |                                                                          |         |                                          |         |                                                                                 |  |                            |
| Missing Data                  | 1,384                | 1,366                        | (0.4%)  | 42                                                      | (0.4%)  | 18                      | (0.7%)  | 6                                          | (0.5%)  | *1-5                                                                     |         | *7-11                                    |         | 0.04                                                                            |  |                            |
| Age and Labour Force Quintile |                      |                              |         |                                                         |         |                         |         |                                            |         |                                                                          |         |                                          |         |                                                                                 |  |                            |
| Missing Data                  | 3,921                | 3,839                        | (1.2%)  | 174                                                     | (1.6%)  | 82                      | (3.0%)  | 33                                         | (2.7%)  | 27                                                                       | (2.5%)  | 22                                       | (5.3%)  | 0.09                                                                            |  |                            |
| Quintile 1 (Q1)               | 38,644               | 38,268                       | (11.9%) | 1,950                                                   | (17.9%) | 376                     | (13.8%) | 141                                        | (11.6%) | 179                                                                      | (16.3%) | 56                                       | (13.4%) | 0.11                                                                            |  |                            |
| Q2                            | 47,776               | 47,247                       | (14.7%) | 1,986                                                   | (18.2%) | 529                     | (19.1%) | 200                                        | (16.5%) | 248                                                                      | (22.6%) | 81                                       | (29.3%) | 0.03                                                                            |  |                            |
| Q3                            | 51,678               | 51,229                       | (16.0%) | 1,947                                                   | (17.8%) | 449                     | (16.4%) | 189                                        | (15.6%) | 173                                                                      | (15.7%) | 87                                       | (20.8%) | 0.04                                                                            |  |                            |
| Q4                            | 61,440               | 60,966                       | (19.0%) | 2,001                                                   | (18.3%) | 474                     | (17.3%) | 213                                        | (17.5%) | 195                                                                      | (17.7%) | 66                                       | (15.8%) | 0.03                                                                            |  |                            |
| Q5 (Highest)                  | 120,268              | 119,446                      | (37.2%) | 2,855                                                   | (26.2%) | 82                      | (30.1%) | 438                                        | (36.1%) | 277                                                                      | (25.2%) | 107                                      | (25.5%) | 0.09                                                                            |  |                            |
| Material Resources Quintile   |                      |                              |         |                                                         |         |                         |         |                                            |         |                                                                          |         |                                          |         |                                                                                 |  |                            |
| Missing Data                  | 3,921                | 3,839                        | (1.2%)  | 174                                                     | (1.6%)  | 82                      | (3.0%)  | 33                                         | (2.7%)  | 27                                                                       | (2.5%)  | 22                                       | (5.3%)  | 0.09                                                                            |  |                            |
| Quintile 1 (Q1)               | 57,431               | 57,150                       | (17.8%) | 1,771                                                   | (16.2%) | 281                     | (10.3%) | 154                                        | (12.7%) | 97                                                                       | (8.8%)  | 30                                       | (7.2%)  | 0.18                                                                            |  |                            |
| Q2                            | 60,267               | 59,900                       | (18.7%) | 1,814                                                   | (16.6%) | 367                     | (13.4%) | 189                                        | (15.6%) | 127                                                                      | (11.6%) | 51                                       | (12.2%) | 0.09                                                                            |  |                            |

Appendix 8, as submitted by the authors. Appendix to: Lau J, Scott MM, Everett K, et al. Association between opioid use disorder and palliative care: a cohort study using linked health administrative data in Ontario, Canada. *CMAJ* 2024. doi: 10.1503/cmaj.231419. Copyright © 2024 The Author(s) or their employer(s). To receive this resource in an accessible format, please contact us at [cmajgroup@cmaj.ca](mailto:cmajgroup@cmaj.ca).

|                                              |        |        |         |       |         |       |         |     |         |     |         |     |         |      |
|----------------------------------------------|--------|--------|---------|-------|---------|-------|---------|-----|---------|-----|---------|-----|---------|------|
| Q3                                           | 62,173 | 61,793 | (19.3%) | 2,109 | (19.3%) | 380   | (13.9%) | 186 | (15.3%) | 140 | (12.7%) | 54  | (12.9%) | 0.15 |
| Q4                                           | 66,173 | 65,652 | (20.5%) | 2,269 | (20.8%) | 521   | (19.1%) | 230 | (18.9%) | 209 | (19.0%) | 82  | (19.6%) | 0.04 |
| Q5 (Highest)                                 | 73,762 | 72,661 | (22.6%) | 2,776 | (25.4%) | 1,101 | (40.3%) | 422 | (34.8%) | 499 | (45.4%) | 180 | (43.0%) | 0.32 |
| Racialized and Newcomer Populations Quintile |        |        |         |       |         |       |         |     |         |     |         |     |         |      |
| Missing Data                                 | 3,921  | 3,839  | (1.2%)  | 174   | (1.6%)  | 82    | (3.0%)  | 33  | (2.7%)  | 27  | (2.5%)  | 22  | (5.3%)  | 0.09 |
| Quintile 1 (Q1)                              | 75,682 | 75,128 | (23.4%) | 2,276 | (20.9%) | 554   | (20.3%) | 285 | (23.5%) | 187 | (17.0%) | 82  | (19.6%) | 0.01 |
| Q2                                           | 70,590 | 69,927 | (21.8%) | 2,204 | (20.2%) | 663   | (24.3%) | 320 | (26.4%) | 233 | (21.2%) | 110 | (26.3%) | 0.10 |
| Q3                                           | 60,149 | 59,600 | (18.6%) | 2,054 | (18.8%) | 549   | (20.1%) | 232 | (19.1%) | 245 | (22.3%) | 72  | (17.2%) | 0.03 |
| Q4                                           | 56,598 | 56,100 | (17.5%) | 1,976 | (18.1%) | 498   | (18.2%) | 189 | (15.6%) | 231 | (21.0%) | 78  | (18.6%) | 0    |
| Q5 (Highest)                                 | 56,787 | 56,401 | (17.6%) | 2,229 | (20.4%) | 386   | (14.1%) | 155 | (12.8%) | 176 | (16.0%) | 55  | (13.1%) | 0.17 |
| Household Dwellings Quintile                 |        |        |         |       |         |       |         |     |         |     |         |     |         |      |
| Missing Data                                 | 3,921  | 3,839  | (1.2%)  | 174   | (1.6%)  | 82    | (3.0%)  | 33  | (2.7%)  | 27  | (2.5%)  | 22  | (5.3%)  | 0.09 |
| Quintile 1 (Q1)                              | 37,105 | 36,918 | (11.5%) | 1,497 | (13.7%) | 187   | (6.8%)  | 90  | (7.4%)  | 76  | (6.9%)  | 21  | (5.0%)  | 0.23 |
| Q2                                           | 50,270 | 49,976 | (15.6%) | 1,741 | (16.0%) | 294   | (10.8%) | 151 | (12.4%) | 110 | (10.0%) | 33  | (7.9%)  | 0.15 |
| Q3                                           | 60,271 | 59,862 | (18.6%) | 1,998 | (18.3%) | 409   | (15.0%) | 206 | (17.0%) | 150 | (13.6%) | 53  | (12.6%) | 0.09 |
| Q4                                           | 72,887 | 72,296 | (22.5%) | 2,360 | (21.6%) | 591   | (21.6%) | 283 | (23.3%) | 235 | (21.4%) | 73  | (17.4%) | 0    |
| Q5                                           | 99,273 | 98,104 | (30.6%) | 3,143 | (28.8%) | 1,169 | (42.8%) | 451 | (37.1%) | 501 | (45.6%) | 217 | (51.8%) | 0.30 |
| Immigrant Status                             | 21,006 | 20,931 | (6.5%)  | 1,127 | (10.3%) | 75    | (2.7%)  | 33  | (2.7%)  | 36  | (3.3%)  | 6   | (1.4%)  | 0.31 |

- A: Decedents with OUD (cases) were matched to decedents without OUD group (controls) on age  $\pm$  2 years  
B: Standardized difference compares all patients with OUD (Total OUD) with age-matched decedents without OUD  
C: Total OUD cases remained unchanged after matching to No OUD group (controls) on age  $\pm$  2 years  
D: OAT – Opioid Agonist Treatment  
E: Blank cells a result of missing data

**Table 2.** Characteristics of decedent cohort related to comorbidities and chronic conditions, comparing those who died of non-sudden death causes with a history of opioid use disorder (OUD) to those without OUD .

| Characteristic                              | No. (%) of decedents |                              |         |                                                             |         |                                            |                                                                          |                                          |                                                                                 |      |         |      | Std. Diff. <sup>B</sup> |      |
|---------------------------------------------|----------------------|------------------------------|---------|-------------------------------------------------------------|---------|--------------------------------------------|--------------------------------------------------------------------------|------------------------------------------|---------------------------------------------------------------------------------|------|---------|------|-------------------------|------|
|                                             | Total<br>n= 323,727  | No OUD<br>n= 320,995 (99.1%) |         | No OUD (age-<br>matched <sup>A</sup> )<br>n= 10,913 (3.37%) |         | OUD<br>n= 2,732 (0.84%)                    |                                                                          |                                          |                                                                                 |      |         |      |                         |      |
|                                             |                      |                              |         |                                                             |         | Total OUD <sup>C</sup><br>n= 2,732 (0.84%) | Hospitalizations or<br>emergency<br>department visits<br>n=1,214 (0.38%) | OAT <sup>D</sup> only<br>n=1,099 (0.34%) | Hospitalizations or<br>emergency department<br>visits and OAT<br>n= 419 (0.13%) |      |         |      |                         |      |
| <b>Number of Active Comorbidities</b>       |                      |                              |         |                                                             |         |                                            |                                                                          |                                          |                                                                                 |      |         |      |                         |      |
| 0                                           | 21,024               | 20,834                       | (6.5%)  | 1,407                                                       | (12.9%) | 190                                        | (7.0%)                                                                   | 19                                       | (1.6%)                                                                          | 151  | (13.7%) | 20   | (4.8%)                  | 0.2  |
| 1                                           | 51,215               | 50,855                       | (15.8%) | 2,352                                                       | (21.6%) | 360                                        | (13.2%)                                                                  | 72                                       | (5.9%)                                                                          | 230  | (20.9%) | 58   | (13.8%)                 | 0.22 |
| 2                                           | 64,580               | 64,132                       | (20.0%) | 2,414                                                       | (22.1%) | 448                                        | (16.4%)                                                                  | 143                                      | (11.8%)                                                                         | 224  | (20.4%) | 81   | (19.3%)                 | 0.15 |
| 3                                           | 60,448               | 60,016                       | (18.7%) | 1,875                                                       | (17.2%) | 432                                        | (15.8%)                                                                  | 186                                      | (15.3%)                                                                         | 161  | (14.6%) | 85   | (20.3%)                 | 0.04 |
| 4                                           | 48,480               | 48,049                       | (15.0%) | 1,244                                                       | (11.4%) | 431                                        | (15.8%)                                                                  | 221                                      | (18.2%)                                                                         | 141  | (12.8%) | 69   | (16.5%)                 | 0.13 |
| 5                                           | 34,241               | 33,936                       | (10.6%) | 752                                                         | (6.9%)  | 305                                        | (11.2%)                                                                  | 187                                      | (15.4%)                                                                         | 75   | (6.8%)  | 43   | (10.3%)                 | 0.15 |
| 6                                           | 21,644               | 21,404                       | (6.7%)  | 432                                                         | (4.0%)  | 240                                        | (8.8%)                                                                   | 150                                      | (12.4%)                                                                         | 59   | (5.4%)  | 31   | (7.4%)                  | 0.2  |
| 7+                                          | 22,095               | 21,769                       | (6.8%)  | 437                                                         | (4.0%)  | 326                                        | (11.9%)                                                                  | 236                                      | (19.4%)                                                                         | 58   | (5.3%)  | 32   | (7.6%)                  | 0.3  |
| <b>Charlson Score</b>                       |                      |                              |         |                                                             |         |                                            |                                                                          |                                          |                                                                                 |      |         |      |                         |      |
| 0                                           | 29,927               | 29,565                       | (9.2%)  | 949                                                         | (8.7%)  | 362                                        | (13.3%)                                                                  | 148                                      | (12.2%)                                                                         | 130  | (11.8%) | 84   | (20.0%)                 | 0.15 |
| 1                                           | 37,089               | 36,733                       | (11.4%) | 778                                                         | (7.1%)  | 356                                        | (13.0%)                                                                  | 151                                      | (12.4%)                                                                         | 130  | (11.8%) | 75   | (17.9%)                 | 0.2  |
| 2+                                          | 129,411              | 127,939                      | (39.9%) | 4,532                                                       | (41.5%) | 1,472                                      | (53.9%)                                                                  | 857                                      | (70.6%)                                                                         | 389  | (35.4%) | 226  | (53.9%)                 | 0.25 |
| Mean (SD)                                   | 2.87                 | 2.87                         | (2.36)  | 3.33                                                        | (2.54)  | 3.06                                       | (2.57)                                                                   | 3.40                                     | (2.58)                                                                          | 2.71 | (2.46)  | 2.66 | (2.58)                  | 0.1  |
| Median (Q1-Q3)                              | 2                    | 2                            | (1-4)   | 3                                                           | (1-6)   | 2                                          | (1-5)                                                                    | 3                                        | (1-5)                                                                           | 2    | (1-4)   | 2    | (1-4)                   | 0.12 |
| <b>Chronic Conditions</b>                   |                      |                              |         |                                                             |         |                                            |                                                                          |                                          |                                                                                 |      |         |      |                         |      |
| Coronary Artery Disease                     | 56,205               | 55,834                       | (17.4%) | 1,188                                                       | (10.9%) | 371                                        | (13.6%)                                                                  | 246                                      | (20.3)                                                                          | 93   | (8.5%)  | 32   | (7.6%)                  | 0.08 |
| Cancer                                      | 137,284              | 136,379                      | (42.5%) | 4,823                                                       | (44.2%) | 905                                        | (33.1%)                                                                  | 499                                      | (41.1%)                                                                         | 313  | (28.5%) | 93   | (22.2%)                 | 0.23 |
| Chronic Heart Failure                       | 72,175               | 71,652                       | (22.3%) | 1,316                                                       | (12.1%) | 523                                        | (19.1%)                                                                  | 348                                      | (28.7%)                                                                         | 112  | (10.2%) | 63   | (15.0%)                 | 0.2  |
| Chronic Obstructive Pulmonary Disease       | 54,731               | 53,959                       | (16.8%) | 1,275                                                       | (11.7%) | 772                                        | (28.3%)                                                                  | 430                                      | (35.4%)                                                                         | 242  | (22.0%) | 100  | (23.9%)                 | 0.42 |
| Dementia                                    | 47,024               | 46,959                       | (14.6%) | 413                                                         | (3.8%)  | 75                                         | (2.7%)                                                                   | 70                                       | (5.8%)                                                                          | *1-5 |         | *1-5 |                         | 0.06 |
| Diabetes                                    | 103,137              | 102,283                      | (31.9%) | 2,986                                                       | (27.4%) | 854                                        | (31.3%)                                                                  | 502                                      | (41.4%)                                                                         | 240  | (21.8%) | 112  | (26.7)                  | 0.09 |
| Hepatitis C <sup>E</sup>                    | 2,452                | 1,968                        | (0.6%)  | 150                                                         | (1.4%)  | 484                                        | (17.7%)                                                                  | 118                                      | (9.7%)                                                                          | 206  | (18.7%) | 160  | (38.2%)                 | 0.58 |
| Human Immunodeficiency Viruses <sup>F</sup> | 632                  | 575                          | (0.2%)  | 74                                                          | (0.7%)  | 57                                         | (2.1%)                                                                   | 16                                       | (1.3%)                                                                          | 22   | (2.0%)  | 19   | (4.5%)                  | 0.12 |
| Infective Endocarditis                      | 837                  | 707                          | (0.2%)  | 30                                                          | (0.3%)  | 130                                        | (4.8%)                                                                   | 40                                       | (3.3%)                                                                          | 24   | (2.2%)  | 66   | (15.8%)                 | 0.29 |
| Mental Health                               | 41,850               | 40,773                       | (12.7%) | 1,623                                                       | (14.9%) | 1,077                                      | (39.4%)                                                                  | 532                                      | (43.8%)                                                                         | 323  | (29.4%) | 222  | (53.0%)                 | 0.57 |
| Mood Disorder                               | 77,741               | 76,317                       | (23.8%) | 3,199                                                       | (29.3%) | 1,424                                      | (52.1%)                                                                  | 647                                      | (53.3%)                                                                         | 516  | (47.0%) | 261  | (62.3%)                 | 0.48 |
| Renal Disease                               | 60,101               | 59,452                       | (18.5%) | 1,574                                                       | (14.4%) | 649                                        | (23.8%)                                                                  | 403                                      | (33.2%)                                                                         | 139  | (12.6%) | 107  | (25.5%)                 | 0.24 |

Appendix 8, as submitted by the authors. Appendix to: Lau J, Scott MM, Everett K, et al. Association between opioid use disorder and palliative care: a cohort study using linked health administrative data in Ontario, Canada. *CMAJ* 2024. doi: 10.1503/cmaj.231419. Copyright © 2024 The Author(s) or their employer(s). To receive this resource in an accessible format, please contact us at [cmajgroup@cmaj.ca](mailto:cmajgroup@cmaj.ca).

|                             |        |        |        |     |        |     |         |     |        |     |         |     |         |      |
|-----------------------------|--------|--------|--------|-----|--------|-----|---------|-----|--------|-----|---------|-----|---------|------|
| Stroke                      | 20,679 | 20,580 | (6.4%) | 427 | (3.9%) | 99  | (3.6%)  | 66  | (5.4%) | 25  | (2.3%)  | 8   | (1.9%)  | 0.02 |
| Other Harmful Substance Use |        |        |        |     |        |     |         |     |        |     |         |     |         |      |
| Benzodiazepine              | 17     | 190    | (0.1%) | 19  | (0.2%) | 27  | (1.0%)  | 12  | (1.0%) | 9   | (0.8%)  | 6   | (1.4%)  | 0.11 |
| Stimulant                   | 265    | 146    | (0.0%) | 21  | (0.2%) | 119 | (4.4%)  | 43  | (3.5%) | 22  | (2.0%)  | 54  | (12.9%) | 0.28 |
| Alcohol                     | 11,702 | 11,204 | (3.5%) | 661 | (6.1%) | 498 | (18.2%) | 243 | (20%)  | 134 | (12.2%) | 121 | (28.9%) | 0.38 |

A: Decedents with OUD (cases) were matched to decedents without OUD (controls) on age  $\pm$  2 years

B: Standardized difference compares all decedents with OUD (“Total OUD”) with age-matched decedents without OUD (“No OUD (age-matched<sup>A</sup>)”)

C: Number of OUD cases remained unchanged after matching to controls on age  $\pm$  2 years

D: OAT – Opioid Agonist Treatment

E: Lookback period of 5 years before death

F: Lookback for any HIV diagnosis from birth to death

**Table 3.** Palliative care received overall, stratified by setting, and the intensity of palliative care received in the last 3 months of life for patients who died of non-sudden death causes<sup>A</sup>

| Variable                                  | Total<br>n= 323,727 | No OUD<br>n=320,995 (99.1%) | No OUD (age-<br>matched <sup>B</sup> )<br>n=10,913 (3.37%) | OU <sup>C</sup><br>n=2,732 (0.84%) | Unadjusted Relative<br>Risk for all patients<br>(95% CI) |         | Adjusted Relative Risk<br>for all patients (95% CI) |         |      |              |      |              |
|-------------------------------------------|---------------------|-----------------------------|------------------------------------------------------------|------------------------------------|----------------------------------------------------------|---------|-----------------------------------------------------|---------|------|--------------|------|--------------|
| No. (%) of decedents                      |                     |                             |                                                            |                                    |                                                          |         |                                                     |         |      |              |      |              |
| Any palliative<br>care received           | 238,956             | (73.8%)                     | 237,024                                                    | (73.8%)                            | 7,691                                                    | (70.5%) | 1,932                                               | (70.7%) | 1.00 | (0.98; 1.03) | 0.99 | (0.96; 1.01) |
| Palliative care setting                   |                     |                             |                                                            |                                    |                                                          |         |                                                     |         |      |              |      |              |
| Homes                                     |                     |                             |                                                            |                                    |                                                          |         |                                                     |         | 0.73 | (0.68; 0.78) | 0.75 | (0.70; 0.81) |
| Home<br>Care <sup>D</sup>                 | 78,157              | (24.1%)                     | 77,615                                                     | (24.2%)                            | 688                                                      | (6.3%)  | 542                                                 | (19.8%) |      |              |      |              |
| Home MD<br>visits                         | 67,353              | (20.8%)                     | 66,925                                                     | (20.8%)                            | 3,229                                                    | (29.6%) | 428                                                 | (15.7%) |      |              |      |              |
| Clinics                                   | 89,858              | (27.8%)                     | 89,155                                                     | (27.8%)                            | 3,606                                                    | (33.0%) | 703                                                 | (25.7%) | 0.78 | (0.73; 0.83) | 0.79 | (0.74; 0.85) |
| Acute care<br>hospitals                   | 164,201             | (50.7%)                     | 162,595                                                    | (50.7%)                            | 5,987                                                    | (54.9%) | 1,606                                               | (58.8%) | 1.07 | (1.03; 1.11) | 1.03 | (1.00; 1.07) |
| Long term<br>care institutes              | 46,305              | (14.3%)                     | 46,132                                                     | (14.4%)                            | 688                                                      | (6.3%)  | 173                                                 | (6.3%)  | 1.00 | (0.86; 1.18) | 0.98 | (0.83; 1.15) |
| Mean (SD)                                 |                     |                             |                                                            |                                    |                                                          |         |                                                     |         |      |              |      |              |
| Intensity of<br>palliative care<br>(days) | 14.33               | (20.06)                     | 14.31                                                      | (20.05)                            | 17.67                                                    | (21.20) | 16.13                                               | (22.27) | 1.09 | (1.03;1.15)  | 0.91 | (0.86;0.96)  |

A: Covariates in modified Poisson regression models: year at index, age, sex, rurality, income quintile, dependency quintile, immigrant status, Charlson comorbidity index, asthma, HIV, hepatitis C, infective endocarditis, cancer, congestive heart failure, chronic obstructive pulmonary disease, renal disease, osteoarthritis, and history of drug toxicity (stimulants, benzodiazepines, alcohol).

B: Decedents with OUD (cases) were matched to decedents without OUD group (controls) on age  $\pm$  2 years

C: Number of OUD cases remained unchanged after matching to controls on age  $\pm$  2 years

D: Palliative home care is public funded home-based palliative care services including case coordinator, nurse, personal support worker, occupational therapy, physiotherapy and equipment. It does not include physician visits.

**Table 4.** Timing of palliative care among all decedents who died of non-sudden death causes and received palliative care within 365 days of death

| Characteristic                                                                 | No. (%) of decedents    |                              |          |                                                           |          |                         |          |                                            |          |                                                                          |          |                                          |          |                                                                                    |  |
|--------------------------------------------------------------------------------|-------------------------|------------------------------|----------|-----------------------------------------------------------|----------|-------------------------|----------|--------------------------------------------|----------|--------------------------------------------------------------------------|----------|------------------------------------------|----------|------------------------------------------------------------------------------------|--|
|                                                                                | Total<br>n= 255,233     | No OUD<br>n= 253,063 (99.1%) |          | No OUD (age<br>matched <sup>A</sup> )<br>n= 8,145 (3.19%) |          | OUD<br>n= 2,170 (0.85%) |          | Total OUD <sup>C</sup><br>n= 2,170 (0.85%) |          | Hospitalizations or<br>emergency department<br>visits<br>n=1,214 (0.38%) |          | OAT <sup>D</sup> only<br>n=1,099 (0.34%) |          | Hospitalizations or<br>emergency<br>department visits<br>and OAT<br>n= 419 (0.13%) |  |
| Initiation of PC <sup>E</sup> was within last 90 days before death             | 125,800                 | 125,075                      | (49.4%)  | 3,777                                                     | (46.4%)  | 725                     | (33.4%)  | 240                                        | (23.0%)  | 386                                                                      | (49.4%)  | 99                                       | (28.9%)  | 027                                                                                |  |
| Setting for PC if initiated within last 90 days before death                   |                         |                              |          |                                                           |          |                         |          |                                            |          |                                                                          |          |                                          |          |                                                                                    |  |
| Acute care                                                                     | 78,068                  | 77,455                       | (61.9%)  | 2,708                                                     | (71.7%)  | 619                     | (84.6%)  | 181                                        | (75.4%)  | 334-338 <sup>E</sup>                                                     | (63.1%)  | 94-98 <sup>E</sup>                       | (80.7%)  | 0.34                                                                               |  |
| Clinic                                                                         | 11,529                  | 11,488                       | (9.2%)   | 371                                                       | (9.8%)   | 41                      | (5.7%)   | 16                                         | (6.7%)   | 20-24 <sup>E</sup>                                                       | (22.2%)  | 1-5 <sup>E</sup>                         | (9.8%)   | 0.19                                                                               |  |
| Home                                                                           | 19,248                  | 19,193                       | (15.3%)  | 553                                                       | (14.6%)  | 55                      | (7.6%)   | 29                                         | (12.1%)  | 21-25 <sup>E</sup>                                                       | (22.2%)  | 1-5 <sup>E</sup>                         | (9.8%)   | 0.23                                                                               |  |
| Long term care                                                                 | 16,955                  | 16,939                       | (13.5%)  | 145                                                       | (3.8%)   | 16                      | (2.2%)   | 11-15 <sup>E</sup>                         | (4.0%)   | 1-5 <sup>E</sup>                                                         | (22.2%)  | 1-5 <sup>E</sup>                         | (9.8%)   | 0.1                                                                                |  |
| Setting for PC if initiated before the last 90 days (91-365 days before death) |                         |                              |          |                                                           |          |                         |          |                                            |          |                                                                          |          |                                          |          |                                                                                    |  |
| Acute care                                                                     | 61,554                  | 60,592                       | (47.3%)  | 2,214                                                     | (50.7%)  | 962                     | (66.6%)  | 515                                        | (64.0%)  | 250                                                                      | (63.1%)  | 197                                      | (80.7%)  | 0.34                                                                               |  |
| Clinic                                                                         | 14,402                  | 14,247                       | (11.1%)  | 761                                                       | (17.4%)  | 155                     | (10.7%)  | 81                                         | (10.1%)  | 52-56 <sup>F</sup>                                                       | (22.2%)  | 18-22 <sup>E</sup>                       | (9.8%)   | 0.21                                                                               |  |
| Home                                                                           | 41,001                  | 40,712                       | (31.8%)  | 1,229                                                     | (28.1%)  | 289                     | (20.0%)  | 177                                        | (22.0%)  | 88                                                                       | (22.2%)  | 24                                       | (9.8%)   | 0.19                                                                               |  |
| Long term care                                                                 | 12,476                  | 12,437                       | (9.7%)   | 164                                                       | (3.8%)   | 39                      | (2.7%)   | 32                                         | (4.0%)   | 2-6 <sup>E</sup>                                                         | (22.2%)  | 1-5 <sup>E</sup>                         | (9.8%)   | 0.06                                                                               |  |
| Time of initiation before death (days)                                         | Mean (SD <sup>G</sup> ) |                              |          |                                                           |          |                         |          |                                            |          |                                                                          |          |                                          |          |                                                                                    |  |
| Overall                                                                        | 134.99                  | 134.62                       | (125.45) | 142.26                                                    | (124.93) | 178.04                  | (129.59) | 203.55                                     | (122.94) | 139.01                                                                   | (130.47) | 189.33                                   | (126.09) | 0.28                                                                               |  |
| Acute care                                                                     | 189.42                  | 189.09                       | (128.40) | 191.74                                                    | (128.97) | 246.90                  | (120.96) | 252.53                                     | (118.82) | 235.27                                                                   | (128.55) | 250.31                                   | (105.70) | 0.44                                                                               |  |
| Clinic                                                                         | 114.09                  | 113.60                       | (115.29) | 116.96                                                    | (116.35) | 156.76                  | (125.15) | 185.23                                     | (119.04) | 112.92                                                                   | (119.76) | 177.02                                   | (125.56) | 0.33                                                                               |  |
| Home                                                                           | 144.95                  | 144.37                       | (123.07) | 175.38                                                    | (120.41) | 228.64                  | (120.51) | 232.47                                     | (118.35) | 190.36                                                                   | (130.61) | 277.43                                   | (91.55)  | 0.44                                                                               |  |
| Long term care                                                                 | 113.93                  | 113.76                       | (132.60) | 138.63                                                    | (136.05) | 203.38                  | (138.63) | 200.50                                     | (140.03) | 228.57                                                                   | (118.13) |                                          |          | 0.47                                                                               |  |

A: Decedents with OUD (cases) were matched to patients without OUD group (controls) on age ± 2 years

B: Standardized difference compares all decedents with OUD (“Total OUD”) with age-matched decedents without OUD (“No OUD (age-matched<sup>A</sup>)”)

C: Number of OUD cases remained unchanged after matching to No OUD group (controls) on age ± 2 years

D: OAT – Opioid Agonist Treatment

E: PC – Palliative Care

F: Ranges presented to prevent back-calculation of small cell counts (<=5)

G: Standard Deviation

**Table 5: Top 10 causes of death for decedents with and without opioid use disorder (OUD) after excluding sudden causes**

| No OUD (n=320,995)                                                    | %    | OUD (n=2,732)                                                         | %    |
|-----------------------------------------------------------------------|------|-----------------------------------------------------------------------|------|
| Neoplasms                                                             | 29.4 | Diseases of the Circulatory System                                    | 22.5 |
| Diseases of the Circulatory System                                    | 27.1 | Neoplasms                                                             | 21.9 |
| Diseases of the Respiratory System                                    | 11.5 | Mental Disorders                                                      | 13.2 |
| Mental Disorders                                                      | 9.2  | Diseases of the Respiratory System                                    | 12.9 |
| Diseases of the Digestive System                                      | 4.3  | Diseases of the Digestive System                                      | 7.7  |
| Diseases of the Nervous System and Sense Organs                       | 4.2  | Infectious and Parasitic Diseases                                     | 6.3  |
| Diseases of the Genitourinary System                                  | 3.7  | Endocrine, Nutritional, and Metabolic Diseases and Immunity Disorders | 5.0  |
| Endocrine, Nutritional, and Metabolic Diseases and Immunity Disorders | 3.2  | Symptoms, Signs, and Ill-Defined Conditions                           | 3.7  |
| Symptoms, Signs, and Ill-Defined Conditions                           | 3.0  | Diseases of the Genitourinary System                                  | 3.7  |
| Infectious and Parasitic Diseases                                     | 2.82 | Diseases of the Nervous System and Sense Organs                       | 2.4  |
|                                                                       |      |                                                                       | 1.5  |
